# Supplementary material
Source: Royal Society of Chemistry journal article supplement (doi:10.1039/d6ta01756h)
Supplement: d6ta01756h1.pdf [file d6ta01756h1.pdf]

# Adsorption of conducting polymer to high-surface-area nanoengineered cellulose fibers to facilitate rapid fabrication of highly conductive papers

*Nuzhet I. Kilic<sup>‡,a,b</sup>, Johanna Sjölund<sup>‡,a,c</sup>, Yunfan Lin<sup>d</sup>, Marica Muccini<sup>e</sup>, Erica Zeglio<sup>e,f,g</sup>, Tobias Bensefelt<sup>a</sup>, Mahiar M. Hamedi<sup>\*,a,b</sup>, Per A. Larsson<sup>\*,a,b,c</sup>*

‡ These authors contributed equally to this work; author order reflects relative contribution

\*corresponding authors: [mahiar@kth.se](mailto:mahiar@kth.se), [perl5@kth.se](mailto:perl5@kth.se)

<sup>a</sup>Department of Fibre and Polymer Technology, KTH Royal Institute of Technology, Teknikringen 56-58, SE-100 44 Stockholm, Sweden

<sup>b</sup>DCC Digital Cellulose Center, KTH Royal Institute of Technology, SE-100 44 Stockholm, Sweden

<sup>c</sup>FibRe Centre for Lignocellulose-based Thermoplastics, KTH Royal Institute of Technology, SE-100 44 Stockholm, Sweden

<sup>d</sup>Department of Protein Science, KTH Royal Institute of Technology, SciLifeLab, Tomtebodavägen 23a, 171 65 Solna, Stockholm County, Sweden

<sup>e</sup>Stockholm University, Wallenberg Initiative Materials Science for Sustainability and Digital Futures, Department of Chemistry, Svante Arrhenius Väg 16C, Stockholm, Stockholm County, SE-114 18, Sweden

<sup>f</sup>Karolinska Institutet, AIMES -Center for the Advancement of Integrated Medical and Engineering Sciences, Department of Neuroscience, Biomedicum, Solnavägen 9, Solna, Stockholm County, SE-171 65

<sup>g</sup>Stockholm University Center for Circular and Sustainable Systems (SUCCeSS), Stockholm University, SE-106 91 Stockholm, Sweden

## Supporting Information

By increasing the accessibility of the fiber wall, the available surface area for adsorption is dramatically enhanced. Instead of adsorption being limited to the outer fiber surface, which has a surface area of less than  $1 \text{ m}^2 \text{ g}^{-1}$ , access to nanofibril aggregates or even individual nanofibrils within the fiber wall enables considerably higher loadings. Based on earlier studies, nanofibril aggregates and individual nanofibrils are expected to have cross-sectional dimensions of approximately 30 nm and 4 nm, respectively.<sup>1,2</sup> Assuming a cellulose density of  $1.5 \text{ g cm}^{-3}$ , these dimensions correspond to approximate specific surface areas of  $89 \text{ m}^2 \text{ g}^{-1}$  for nanofibril aggregates and  $667 \text{ m}^2 \text{ g}^{-1}$  for individual nanofibrils.

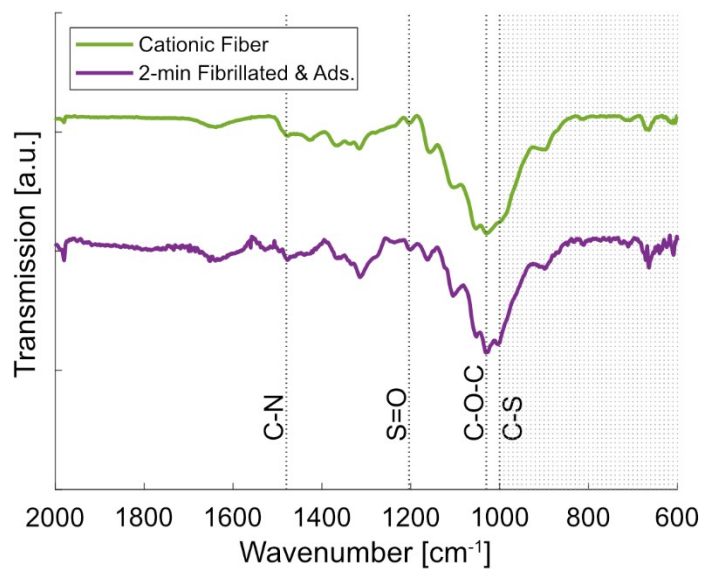

**Figure S1.** FT-IR spectra of cationized fibers and pre-fibrillated, PEDOT:PSS-adsorbed cationic fibers.

Fourier-transform infrared (FT-IR) spectroscopy shows indicative bands of both fiber cationization and PEDOT:PSS adsorption (Figure S2). Cationized fibers exhibited a band at 1478  $\text{cm}^{-1}$ , assigned to C–N stretching vibrations, confirming the successful introduction of quaternary ammonium groups and consistent with the measured charge density.<sup>3</sup> Fibers subjected to PEDOT:PSS adsorption showed several characteristic bands, including a band near 1000  $\text{cm}^{-1}$  attributed to C–S stretching and a band at 1204  $\text{cm}^{-1}$  corresponding to asymmetric sulfonyl (S=O) stretching, both characteristic of PEDOT:PSS.<sup>4,5</sup> The region between 600 and 1000  $\text{cm}^{-1}$  further displayed multiple C–S vibrational bands, providing additional confirmation of the presence of PEDOT:PSS.<sup>4</sup>

**Table S1.** Polyelectrolyte titration values from the collected filtrate of the PEDOT:PSS-adsorbed samples.

| <b>Sample</b>     | <b>Fiber dry mass [g]</b> | <b>Fiber Charge [<math>\mu\text{eq}</math>]</b> | <b>Added Charge [<math>\mu\text{eq}</math>]</b> | <b>Adsorbed Charge [<math>\mu\text{eq}</math>]</b> | <b>Adsorption of Added Amount [%]</b> | <b>Total Charge Adsorbed [%]</b> |
|-------------------|---------------------------|-------------------------------------------------|-------------------------------------------------|----------------------------------------------------|---------------------------------------|----------------------------------|
| 10 wt% Adsorption | 0.5                       | 505                                             | 404                                             | 200                                                | 49.6                                  | 39.7                             |
| 20 wt% Adsorption | 0.5                       | 505                                             | 404                                             | 404                                                | 100.0                                 | 80.0                             |
| 30 wt% Adsorption | 0.5                       | 525                                             | 840                                             | 830                                                | 98.8                                  | 158                              |

**Table S2.** Calculated adsorbed PEDOT:PSS amounts relative to the total mass of the papers, dry mass of fibers used correspond to 2 g.

| <b>Sample</b>     | <b>Total Charge Adsorbed [%] *</b> | <b>Adsorbed Charge Correspondence [<math>\mu\text{eq}</math>]</b> | <b>Adsorbed PEDOT:PSS Relative to Total Mass [%]</b> |
|-------------------|------------------------------------|-------------------------------------------------------------------|------------------------------------------------------|
| 10 wt% Adsorption | 39.7                               | 801                                                               | 10.29                                                |
| 20 wt% Adsorption | 80.0                               | 1616                                                              | 18.79                                                |
| 30 wt% Adsorption | 158.0                              | 3192                                                              | 30.32                                                |

The amount of adsorbed PEDOT:PSS relative to the total mass was calculated for a single paper sheet with a total fiber weight of 2 grams. The charge density of PEDOT:PSS was determined to be  $3490 \mu\text{eq g}^{-1}$  by polyelectrolyte titration. The total charge density of the cationic fibers was estimated to be approximately  $1010 \mu\text{eq g}^{-1}$  using conductometric titration. The PEDOT:PSS concentration in the batch was reported to be between 1.0 and 1.3 wt%, and a value of 1.15 wt% was assumed for the calculations.

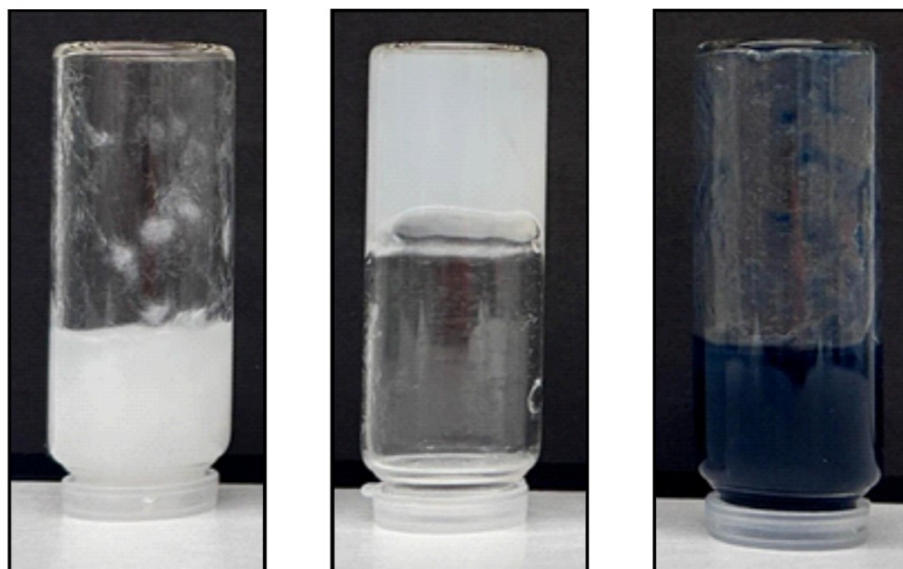

**Figure S2.** From left to right: cationized fibers; cationized fibers mixed under mild agitation for 7 days, showing visual gelation where the material does not fall off; PEDOT:PSS-adsorbed 7-day sample.

**Table S3.** Duration of paper-making steps before and after adsorption.

| <b>Steps</b>            | <b>Cationized<br/>Fibers</b> | <b>20 wt%<br/>ads.</b> | <b>1min-<br/>Fibrillated 20<br/>wt% ads.</b> | <b>2min-<br/>Fibrillated 20<br/>wt% ads.</b> | <b>2min-<br/>Fibrillated 30<br/>wt% ads.</b> |
|-------------------------|------------------------------|------------------------|----------------------------------------------|----------------------------------------------|----------------------------------------------|
| Filling Time [s]        | 10                           | 10                     | 10                                           | 10                                           | 10                                           |
| Agitation Time [s]      | 7                            | 7                      | 7                                            | 7                                            | 7                                            |
| Calming Time [s]        | 5                            | 5                      | 5                                            | 5                                            | 5                                            |
| De-watering Time<br>[s] | 9                            | 19                     | 32                                           | 118                                          | ~2000                                        |
| Draining Time [s]       | 12                           | 12                     | 12                                           | 12                                           | 12                                           |
| Total Time [s]          | 43                           | 53                     | 66                                           | 152                                          | ~2000                                        |

**Table S4.** Summary of the mechanical test results

| <b>Sample</b>                                                       | <b>Density</b><br>[kg m <sup>-3</sup> ] | <b>Strain</b><br>[%] | <b>Stress</b><br>[MPa] | <b>Modulus</b><br>[GPa] |
|---------------------------------------------------------------------|-----------------------------------------|----------------------|------------------------|-------------------------|
| Cationic Fiber                                                      | 710                                     | 6.8 ± 0.4            | 56.6 ± 1.5             | 3.6 ± 0.3               |
| Cationic Fibers – 7 day<br>(stirred)                                | 790                                     | 6.3 ± 0.9            | 84.4 ± 9.0             | 4.8 ± 0.8               |
| 1-day Ads.<br>(10 wt% PEDOT:PSS)                                    | 750                                     | 6.1 ± 0.3            | 62.5 ± 4.8             | 3.7 ± 0.9               |
| 7-day Ads.<br>(20 wt% PEDOT:PSS)                                    | 980                                     | 3.7 ± 0.8            | 87.2 ± 9.5             | 6.0 ± 0.5               |
| 1min-Fibrillated & Ads.<br>(20 wt% PEDOT:PSS)                       | 1040                                    | 4.6 ± 0.5            | 95.8 ± 6.3             | 5.5 ± 0.8               |
| 2min-Fibrillated & Ads.<br>(20 wt% PEDOT:PSS)                       | 1050                                    | 4.5 ± 0.5            | 110 ± 11               | 6.1 ± 1.1               |
| 2min-Fibrillated & Ads.<br>(20 wt% PEDOT:PSS)<br>DMSO:IPA Treatment | 1350                                    | 1.7 ± 0.3            | 5.8 ± 1.2              | 0.77 ± 0.14             |
| 2min-Fibrillated & Ads.<br>(20 wt% PEDOT:PSS)<br>IPA Treatment      | 1530                                    | 1.8 ± 0.9            | 1.3 ± 0.5              | 0.18 ± 0.05             |
| 2min-Fibrillated & Ads.<br>(30 wt% PEDOT:PSS)<br>DMSO:IPA Treatment | 1530                                    | 2.6 ± 0.3            | 7.4 ± 0.9              | 0.92 ± 0.08             |
| 2min-Fibrillated & Ads.<br>(30 wt% PEDOT:PSS)<br>IPA Treatment      | 1600                                    | 4.4 ± 0.8            | 2.6 ± 0.2              | 0.31 ± 0.02             |

**Table S5.** Comparison of electrical performance of PEDOT:PSS-based conductive paper systems reported in the literature and in this work.

| <b>Material</b>                                                                                           | <b>Adsorption/<br/>Coating Amount<br/>[ wt%]</b>                                                                                            | <b>Electrical<br/>Conductivity<br/>[S cm<sup>-1</sup>]</b> | <b>Sheet Resistance<br/>[ohm sq<sup>-1</sup>]/ Resistance<br/>[ohm]</b> | <b>Reference</b> |
|-----------------------------------------------------------------------------------------------------------|---------------------------------------------------------------------------------------------------------------------------------------------|------------------------------------------------------------|-------------------------------------------------------------------------|------------------|
| PEDOT:PSS/<br>Cationic<br>Cellulose Fibers                                                                | 1.00                                                                                                                                        | 0.028                                                      | NA                                                                      | 6                |
| PEDOT:PSS/<br>Paper                                                                                       | NA                                                                                                                                          | 78                                                         | Sheet Resistance: 30                                                    | 7                |
| PEDOT:PSS/<br>Cationic Cellulose<br>Fibers/ Carbon<br>Black/ Activated<br>Carbon/ Cellulose<br>Nanofibers | Cationic Fibers with<br>PEDOT: PSS : 53.2<br>Activated Carbon: 45.9<br>Carbon Black with<br>Cellulose Nanofibers: 0.7<br>Retention Aid: 0.2 | ~4                                                         | NA                                                                      | 8                |
| PEDOT:PSS/<br>Cellulose<br>Nanofibers                                                                     | 38.6 ± 2.12<br>62.5 ± 3.6                                                                                                                   | 3.57<br>126.21                                             | NA<br>NA                                                                | 9                |
| PEDOT:PSS/<br>Paper                                                                                       | NA                                                                                                                                          | NA                                                         | Resistance: 19.64                                                       | 10               |
| PEDOT:PSS/<br>Cationic Cellulose<br>Fibers                                                                | 20<br>30                                                                                                                                    | 7.0 ± 0.4<br>13.0 ± 0.7                                    | Sheet Resistance: 23<br>± 1<br>Sheet Resistance: 14<br>± 1              | This Work        |

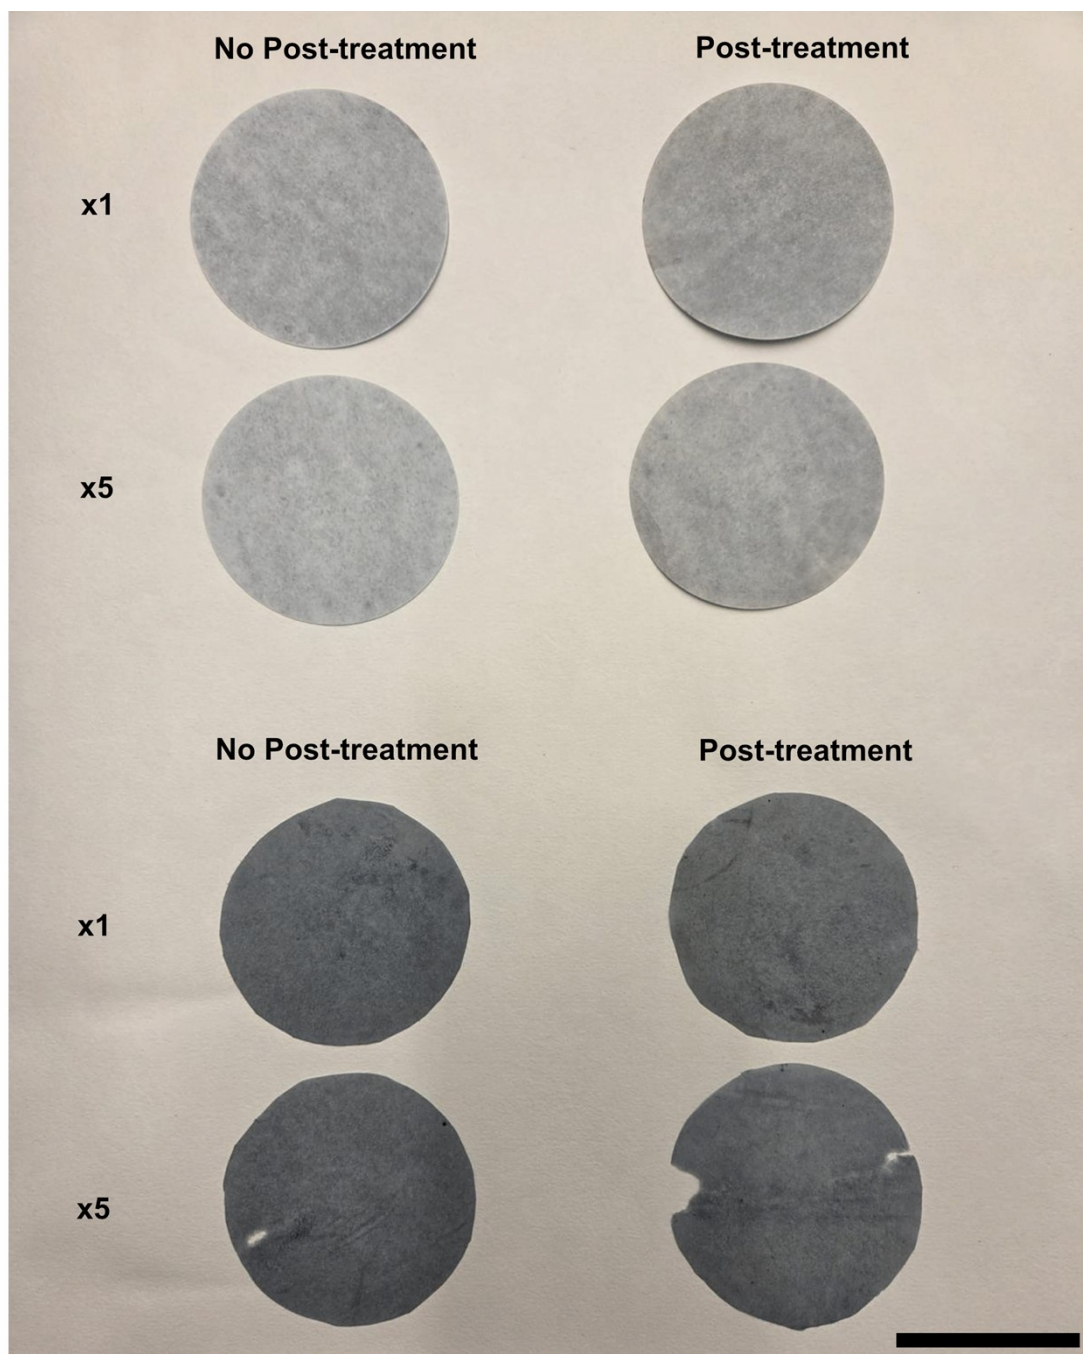

**Figure S3.** Images of commercial Whatman cellulose paper and paper fabricated from cationic cellulose fibers, each dip-coated either once or five times with PEDOT:PSS, followed by post-treatment with sulfuric acid and a DMSO:IPA mixture. Scale bar: 5cm.

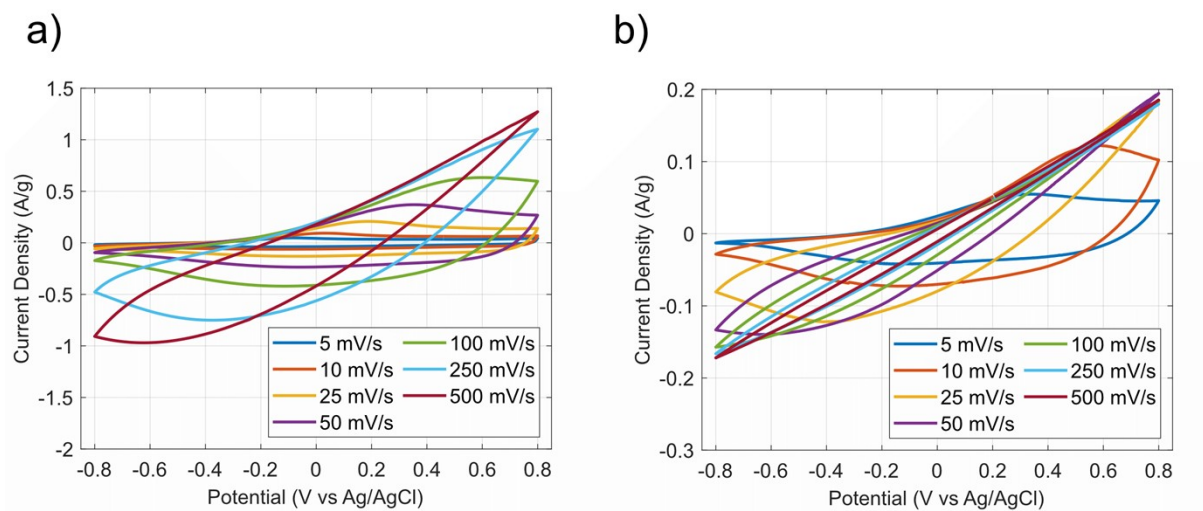

**Figure S4.** CV profiles recorded at scan rates from 5 to 500  $\text{mV s}^{-1}$  in 0.1 M NaCl solution for a) DMSO:IPA post-treated paper and b) untreated paper.

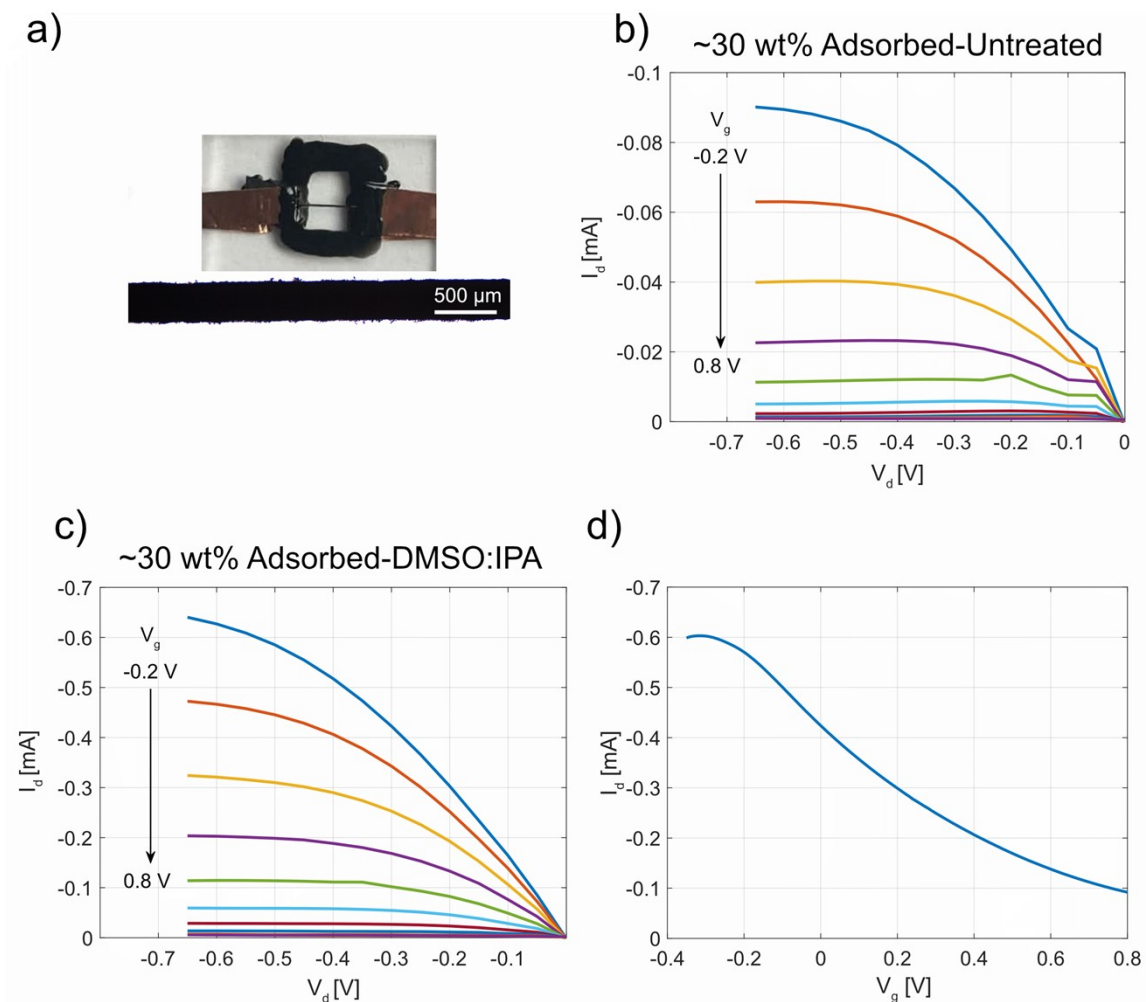

**Figure S5.** a) Image of the fabricated device (top), together with an optical microscopy image of the paper channel (bottom). Output characteristics of devices based on 30 wt% PEDOT:PSS-adsorbed paper b) without post-treatment and c) with DMSO:IPA post-treatment. d) transfer curve of the same device remeasured after 6 months.

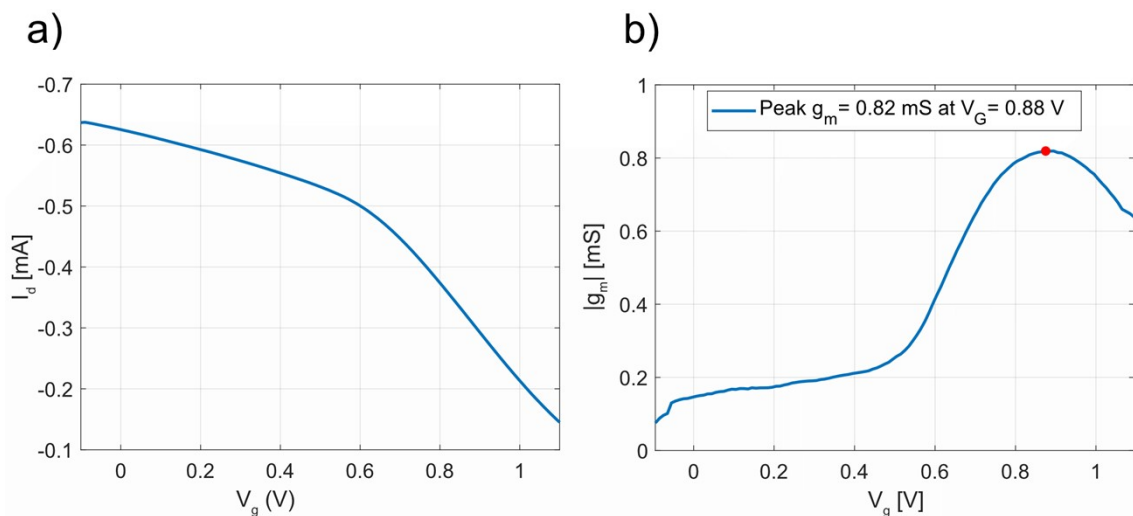

**Figure S6.** a) Transfer characteristics and b) transconductance of 20 wt% PEDOT:PSS-adsorbed paper channels after DMSO:IPA post-treatment, measured in PBS with an Au/PEDOT:PSS/Pt disk electrode gate.

## References

- (1) Larsson, P. T.; Svensson, A.; Wågberg, L. A New, Robust Method for Measuring Average Fibre Wall Pore Sizes in Cellulose I Rich Plant Fibre Walls. *Cellulose* 2013 20:2 **2013**, 20 (2), 623–631. <https://doi.org/10.1007/S10570-012-9850-X>.
- (2) Sjöstedt, A.; Wohler, J.; Larsson, P. T.; Wågberg, L. Structural Changes during Swelling of Highly Charged Cellulose Fibres. *Cellulose* 2015 22:5 **2015**, 22 (5), 2943–2953. <https://doi.org/10.1007/S10570-015-0701-4>.
- (3) Sjölund, J.; Westman, G.; Wågberg, L.; Larsson, P. A. High-Consistency Modification of Cellulose Fibers: Resource-Efficient Introduction of Cationic Charges, and Their Effect on Fiber and Nanofibril Properties. *Carbohydr. Polym.* **2025**, 352, 123254. <https://doi.org/10.1016/J.CARBPOL.2025.123254>.
- (4) Wu, W.; Zeng, H.; Li, Y.; Jiang, H.; Wu, J.; Li, Z.; Zhang, W.; Wang, X.; Xue, Q. Structural-Induced Effects of DES in PEDOT:PSS Aqueous Polymerization. *Polym. Test.* **2023**, 129, 108272. <https://doi.org/10.1016/J.POLYMERTESTING.2023.108272>.
- (5) Hassan, G.; Sajid, M.; Choi, C. Highly Sensitive and Full Range Detectable Humidity Sensor Using PEDOT:PSS, Methyl Red and Graphene Oxide Materials. *Scientific Reports* 2019 9:1 **2019**, 9 (1), 1–10. <https://doi.org/10.1038/s41598-019-51712-w>.
- (6) Hajian, A.; Jain, K.; Kilic, N. I.; Iakunkov, A.; Subramaniyam, C. M.; Wågberg, L.; Larsson, P. A.; Hamed, M. M. Recyclable Electroactive Paper Based on Cationic Fibers

- Adaptable to Industrial Papermaking. *Cellulose* **2024**, *31* (14), 8837–8849. <https://doi.org/10.1007/S10570-024-06128-9/FIGURES/3>.
- (7) Chen, X.; Jiang, F.; Jiang, Q.; Jia, Y.; Liu, C.; Liu, G.; Xu, J.; Duan, X.; Zhu, C.; Nie, G.; Liu, P. Conductive and Flexible PEDOT-Decorated Paper as High Performance Electrode Fabricated by Vapor Phase Polymerization for Supercapacitor. *Colloids Surf. A Physicochem. Eng. Asp.* **2020**, *603*, 125173. <https://doi.org/10.1016/J.COLSURFA.2020.125173>.
- (8) Isacson, P.; Jain, K.; Fall, A.; Chauve, V.; Hajian, A.; Granberg, H.; Boiron, L.; Berggren, M.; Håkansson, K.; Edberg, J.; Engquist, I.; Wågberg, L. Production of Energy-Storage Paper Electrodes Using a Pilot-Scale Paper Machine. *J. Mater. Chem. A Mater.* **2022**, *10* (40), 21579–21589. <https://doi.org/10.1039/D2TA04431E>.
- (9) Du, H.; Zhang, M.; Liu, K.; Parit, M.; Jiang, Z.; Zhang, X.; Li, B.; Si, C. Conductive PEDOT:PSS/Cellulose Nanofibril Paper Electrodes for Flexible Supercapacitors with Superior Areal Capacitance and Cycling Stability. *Chemical Engineering Journal* **2022**, *428*, 131994. <https://doi.org/10.1016/J.CEJ.2021.131994>.
- (10) Fang, S.; Zhou, X.; Lin, L.; Fang, L.; Liu, H.; Liang, B. A Flexible and Conductive Paper Electrode Based on PEDOT:PSS and Platinum Nanohybrids for Glucose Detection. *Microchemical Journal* **2025**, *212*, 113555. <https://doi.org/10.1016/j.microc.2025.113555>.
